# Supplementary material for: Integrated Heat Transfer Management and Policy-Oriented Design of Photovoltaic Systems in Hot Climates Using PCM and Hybrid PV/T Strategies
Source: Research Square preprint supplement (doi:10.21203/rs.3.rs-7945461/v1), 2025-10-28
Supplement: Supplementary file 1 [file 119fe75da552e15aedc33259.docx]

**Tables**

Table 1 presents a comparative summary of ten solar system design configurations, highlighting variations in average panel temperature, efficiency, and heat loss [18].

| Configuration | Avg. Panel Temp (°C) | Efficiency (%) | Heat Loss (W/m²) |
| --- | --- | --- | --- |
| Standard Flat, No Ventilation | 62 | 15.2 | 410 |
| Tilted 15°, No Ventilation | 58 | 15.7 | 385 |
| Flat, Rear-Ventilated | 54 | 16.4 | 350 |
| Tilted 25°, Rear-Ventilated | 48 | 17.8 | 290 |
| Tilted 25°, PCM Integrated | 41 | 19.1 | 225 |
| Tilted 35°, PCM Integrated | 39 | 19.3 | 215 |
| Flat, PCM and Forced Convection | 38 | 19.5 | 205 |
| Tilted 25°, Reflective Coating | 44 | 18.5 | 255 |
| Tilted 25°, Heat Sink Integration | 42 | 18.9 | 240 |
| Hybrid PV/T with PCM and Ventilation | 36 | 20.1 | 190 |

Table 2 Daily Efficiency Profile

| Time of Day | Solar Irradiance (W/m²) | Panel Temp (°C) | Efficiency (%) |
| --- | --- | --- | --- |
| 06:00 | 120 | 22 | 16.9 |
| 08:00 | 280 | 28 | 17.3 |
| 10:00 | 540 | 36 | 17.8 |
| 12:00 | 820 | 48 | 17.2 |
| 14:00 | 890 | 54 | 16.6 |
| 16:00 | 670 | 46 | 17.0 |
| 17:00 | 510 | 38 | 17.4 |
| 18:00 | 300 | 30 | 17.6 |
| 19:00 | 180 | 26 | 17.2 |
| 20:00 | 90 | 24 | 17.0 |

| **Configuration** | **Heat Loss (%)** | **Rank** |
| --- | --- | --- |
| Hybrid PVT | Lowest | Best |
| PCM Cooled | Moderate |  |
| Tilted 20° | Higher |  |
| Standard Flat | Highest | Least efficient |

Table 3 The horizontal bar chart graphically compares 4 configurations

# Table 4 Comparative Performance of Solar Configurations

| **Configuration** | **Temperature (°C)** | **Efficiency (%)** | **Heat Loss (W/m²)** |
| --- | --- | --- | --- |
| Flat | 62 | 15.2 | 410 |
| Tilted 25° + Ventilation | 48 | 17.8 | 290 |
| PCM 35° | 39 | 19.3 | 215 |
| PV/T + PCM + Ventilation | 36 | 20.1 | 190 |
