# Supplementary material for: Integrated Heat Transfer Management and Policy-Oriented Design of Photovoltaic Systems in Hot Climates Using PCM and Hybrid PV/T Strategies
Source: Research Square preprint supplement (doi:10.21203/rs.3.rs-7945461/v1), 2025-10-28
Supplement: Supplementary file 2 [file 406a9b6f1e37fdff6083d251.docx]

**Integrated Heat Transfer Management and Policy-Oriented Design of Photovoltaic Systems in Hot Climates Using PCM and Hybrid PV/T Strategies**

Ekram Hadi Alaskaree¹*, Hadeel Qasim Almaliki², Ahmed Qays Khudhair³
¹,²,³ Mechanical Engineering Department, Middle Technical University, Baghdad, Iraq
Corresponding author: [ekram.hadi@mtu.edu.iq](mailto:ekram.hadi@mtu.edu.iq)
ORCID: <https://orcid.org/0000-0001-9586-9363>

**Highlights**

- Passive cooling enhanced PV performance through the enhancement of heat transfer.
- Thermal behavior was stabilized in the real conditions with ventilation and PCM.
- PVs PV temperature and electrical output were predicted by numerical algorithms accurately.
- There was good thermal modeling between experimental and numerical results.
- The hybrid heat transfer strategy was effective in hot climatic PV systems.
