# Supplementary material for: Integrated Heat Transfer Management and Policy-Oriented Design of Photovoltaic Systems in Hot Climates Using PCM and Hybrid PV/T Strategies
Source: Research Square preprint supplement (doi:10.21203/rs.3.rs-7945461/v1), 2025-10-28
Supplement: Supplementary file 3 [file 57ebc683006ac552c5c55b8c.docx]

**Graphical abstract**


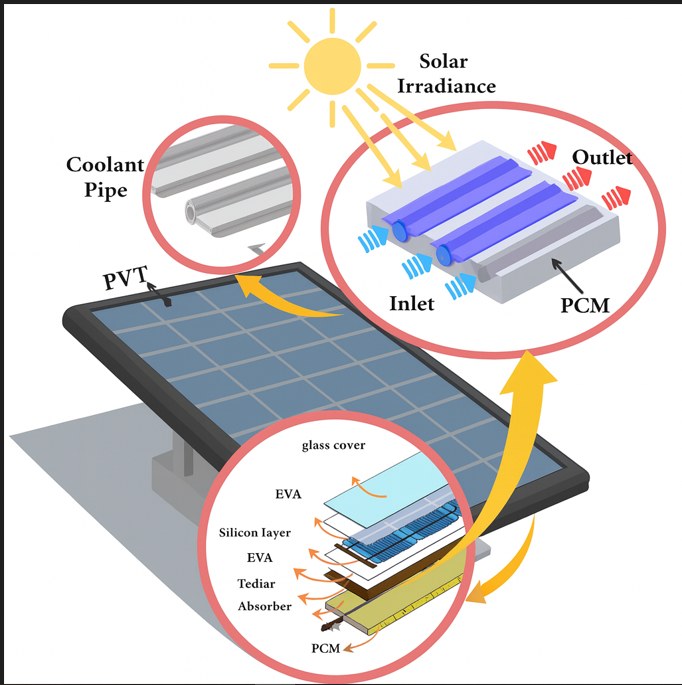


***Graphical Abstract 1*** Structure of a photovoltaic–thermal (PVT) system with integrated PCM and coolant pipes for energy harvesting and heat management.


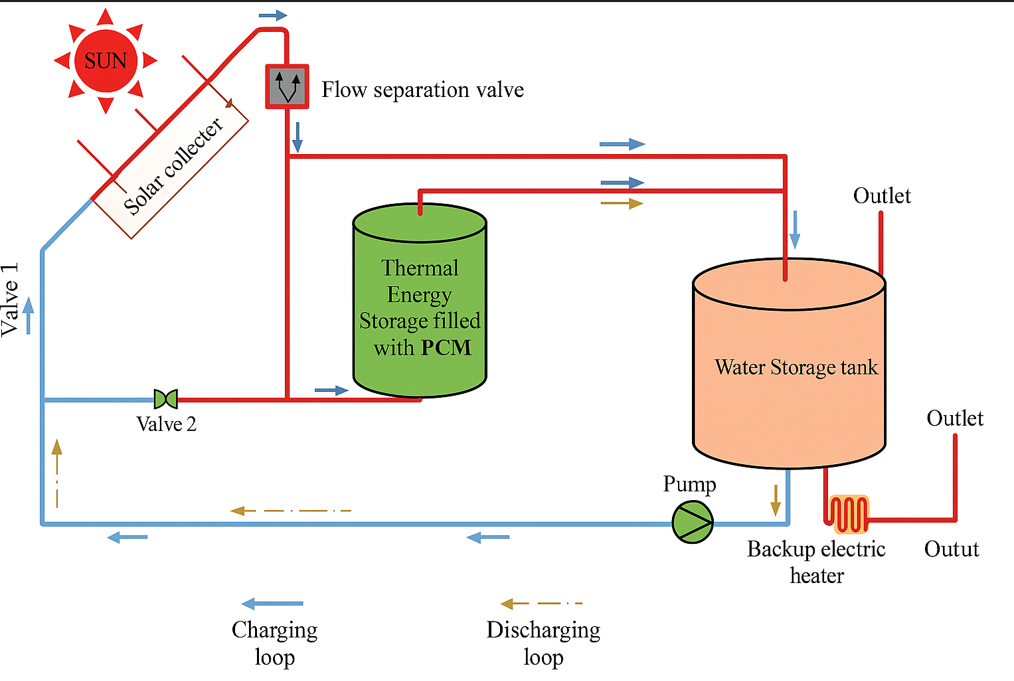


***Graphical Abstract 2*** Schematic diagram of a solar water heating system integrated with PCM thermal energy storage.
